# Supplementary material for: Analysis of POFUT1 Gene Mutation in a Chinese Family with Dowling-Degos Disease
Source: PubMed Central journal article supplement (PMC4144801; doi:10.1371/journal.pone.0104496), 2014-08-26
Supplement: pone.0104496.s005.pdf [file pone.0104496.s005.pdf]

|                               | <b>II 1</b> | <b>II3</b> | <b>II7</b> | <b>III1</b> |
|-------------------------------|-------------|------------|------------|-------------|
| Uniquely mapped, paired reads | 91524940    | 111270190  | 108459553  | 96998042    |
| Uniquely mapped, RF, FR reads | 91412548    | 111151068  | 108277429  | 96892248    |
| After removing PCR replicates | 78524496    | 91335586   | 94578287   | 83339902    |
| PCR redundancy                | 14.1%       | 17.83%     | 12.65%     | 13.99%      |
| Mapped bases                  | 5392872999  | 6261476324 | 6749884812 | 5734579987  |
| Size in ROI                   | 51797509    | 51797509   | 51797509   | 51797509    |
| % bases in ROI                | 68.7%       | 68.6%      | 71.4%      | 68.8%       |
| Mean                          | 105.6       | 120.88     | 130.31     | 111.55      |
| StDev                         | 115.7       | 129.73     | 150.01     | 114.02      |
