# Supplementary material for: Analysis of POFUT1 Gene Mutation in a Chinese Family with Dowling-Degos Disease
Source: PubMed Central journal article supplement (PMC4144801; doi:10.1371/journal.pone.0104496), 2014-08-26
Supplement: pone.0104496.s006.pdf [file pone.0104496.s006.pdf]

| depth                  | II1     | II3     | II7     | III1    |
|------------------------|---------|---------|---------|---------|
| 0                      | 100.00% | 100.00% | 100.00% | 100.00% |
| % bases covered >=5x   | 95.14%  | 96.24%  | 94.85%  | 96.21%  |
| % bases covered >=10x  | 89.80%  | 92.24%  | 89.93%  | 92.17%  |
| % bases covered >=20x  | 80.46%  | 84.61%  | 81.96%  | 84.57%  |
| % bases covered >=30x  | 73.19%  | 78.09%  | 75.66%  | 77.85%  |
| % bases covered >=40x  | 67.25%  | 72.97%  | 70.39%  | 71.85%  |
| % bases covered >=50x  | 62.08%  | 67.38%  | 65.71%  | 66.34%  |
| % bases covered >=60x  | 57.32%  | 62.72%  | 61.45%  | 61.21%  |
| % bases covered >=70x  | 52.82%  | 58.33%  | 57.48%  | 56.32%  |
| % bases covered >=80x  | 48.49%  | 54.12%  | 53.73%  | 51.65%  |
| % bases covered >=90x  | 44.33%  | 50.06%  | 50.16%  | 47.17%  |
| % bases covered >=100x | 40.36%  | 46.16%  | 46.75%  | 42.92%  |
