# Supplementary material for: Analysis of POFUT1 Gene Mutation in a Chinese Family with Dowling-Degos Disease
Source: PubMed Central journal article supplement (PMC4144801; doi:10.1371/journal.pone.0104496), 2014-08-26
Supplement: pone.0104496.s007.pdf [file pone.0104496.s007.pdf]

---

|                         | <b>II1</b> | <b>II3</b> | <b>II7</b> | <b>III1</b> |
|-------------------------|------------|------------|------------|-------------|
| Total number<br>of SNPs | 36051      | 36147      | 36151      | 35975       |
| Synonymous              | 10199      | 10245      | 10259      | 10170       |
| Missense                | 8914       | 9072       | 8982       | 8931        |
| Nonsense                | 84         | 78         | 83         | 79          |
| Splice site             | 286        | 279        | 293        | 304         |
| Intron                  | 12745      | 12651      | 12693      | 12668       |
| 5' UTRs                 | 838        | 846        | 861        | 840         |
| 3' UTRs                 | 1038       | 1040       | 1038       | 1043        |
| Intergenic              | 1947       | 1936       | 1942       | 1940-       |

---
