# Supplementary material for: Analysis of POFUT1 Gene Mutation in a Chinese Family with Dowling-Degos Disease
Source: PubMed Central journal article supplement (PMC4144801; doi:10.1371/journal.pone.0104496), 2014-08-26
Supplement: pone.0104496.s008.pdf [file pone.0104496.s008.pdf]

| chr | position  | ref | alt | Gene     | chr | position  | re<br>f | alt | Gene       |
|-----|-----------|-----|-----|----------|-----|-----------|---------|-----|------------|
| 1   | 52704598  | A   | C   | ZFYVE9   | 3   | 45963216  | G       | C   | FYCO1      |
| 1   | 67263693  | G   | C   | INSL5    | 3   | 48624944  | G       | C   | COL7A1     |
| 11  | 120082064 | C   | A   | OAF      | 3   | 110837786 | A       | G   | PVRL3      |
| 11  | 130773154 | G   | C   | SNX19    | 4   | 95162149  | C       | A   | SMARCA1    |
| 12  | 11244483  | A   | G   | TAS2R43  | 4   | 113460680 | C       | A   | AC023886.1 |
| 12  | 50571362  | G   | A   | LIMA1    | 4   | 113460682 | A       | G   | AC023886.1 |
| 12  | 57139851  | A   | G   | PRIM1    | 4   | 126328128 | C       | T   | FAT4       |
| 12  | 57573248  | C   | T   | LRP1     | 4   | 152571733 | C       | A   | FAM160A1   |
| 12  | 57624626  | G   | A   | SHMT2    | 5   | 140795115 | A       | T   | PCDHGC5    |
| 12  | 66698632  | A   | T   | HELB     | 5   | 149576749 | T       | A   | SLC6A7     |
| 12  | 69135644  | C   | T   | NUP107   | 6   | 47254207  | G       | T   | TNFRSF21   |
| 12  | 100720455 | G   | T   | SCYL2    | 6   | 136552478 | T       | C   | FAM54A     |
| 13  | 114325862 | G   | A   | GRK1     | 6   | 146262798 | G       | A   | SHPRH      |
| 14  | 90734740  | C   | T   | PSMC1    | 7   | 43916458  | G       | A   | URG4       |
| 14  | 96800828  | T   | C   | ATG2B    | 7   | 51096965  | C       | T   | COBL       |
| 14  | 99641781  | G   | A   | BCL11B   | 7   | 65557823  | T       | C   | ASL        |
| 14  | 100795099 | C   | T   | C14orf68 | 7   | 72419420  | A       | C   | POM121     |
| 15  | 40913557  | G   | T   | CASC5    | 8   | 1497351   | C       | T   | DLGAP2     |
| 15  | 78880748  | C   | A   | CHRNA5   | 8   | 6566300   | G       | A   | AGPAT5     |
| 16  | 11857414  | T   | C   | ZC3H7A   | 8   | 11406628  | A       | G   | BLK        |
| 16  | 58073895  | A   | T   | MMP15    | 8   | 23560375  | C       | T   | NKX2-6     |
| 16  | 61858972  | G   | A   | CDH8     | 8   | 24207413  | C       | T   | ADAM28     |
| 17  | 45009498  | G   | A   | GOSR2    | 8   | 125571068 | C       | T   | MTSS1      |
| 17  | 74075985  | G   | A   | ZACN     | 9   | 71869325  | A       | G   | TJP2       |
| 18  | 56586433  | A   | G   | ZNF532   | 9   | 90501933  | T       | C   | C9orf79    |
| 18  | 67231756  | G   | C   | DOK6     | 9   | 92020309  | C       | T   | SEMA4D     |
| 18  | 77896565  | T   | A   | ADNP2    | 9   | 112030682 | T       | G   | EPB41L4B   |

|    |          |   |   |                |   |           |   |   |                   |
|----|----------|---|---|----------------|---|-----------|---|---|-------------------|
| 19 | 2334642  | C | T | AC00441<br>0.1 | 9 | 116053844 | C | T | PRPF4             |
| 19 | 3611261  | G | A | C19orf29       | 9 | 116080895 | C | T | WDR31             |
| 19 | 21607599 | G | A | ZNF493         | X | 17746842  | C | T | NHS               |
| 19 | 21719801 | A | G | ZNF429         | X | 48136977  | C | T | RP11-34<br>4N17.3 |
| 19 | 54759219 | T | C | LILRB5         | X | 53114217  | C | T | TSPYL2            |
| 19 | 54974053 | C | T | LENG9          | X | 68749743  | G | A | FAM155<br>B       |
| 19 | 55998218 | C | T | NAT14          | X | 77373561  | G | C | PGK1              |
| 2  | 37035894 | G | A | VIT            | X | 99931059  | C | T | SYTL4             |
| 2  | 39212915 | C | T | SOS1           | X | 101909416 | T | C | GPRAS<br>P1       |
| 2  | 44571660 | T | A | PREPL          | X | 140985188 | C | T | MAGEC<br>3        |
| 20 | 37150172 | C | T | KIAA121<br>9   | Y | 13309602  | G | T | AC1348<br>78.1    |
| 20 | 37620141 | G | A | DHX35          | Y | 13505584  | A | C | AC1348<br>82.2    |
| 20 | 43052851 | C | G | HNF4A          | Y | 13505618  | T | C | AC1348<br>82.2    |
| 22 | 17073131 | C | T | CESK1          |   |           |   |   |                   |
